# Supplementary material
Source: PubMed Central journal article supplement (PMC4019435)
Supplement: NIHMS576808-supplement-1.pdf [file NIHMS576808-supplement-1.pdf]

|        | Unt.    | LPS                | HPV16<br>PsV<br>Only | 10µM<br>A2ti   | 10µM<br>A2ti<br>+PsV | 25µM<br>A2ti   | 25µM<br>A2ti<br>+PsV | 50µM<br>A2ti     | 50µM<br>A2ti<br>+PsV |
|--------|---------|--------------------|----------------------|----------------|----------------------|----------------|----------------------|------------------|----------------------|
| IL-6   | <LL     | 3082 ±<br>276      | 1.7                  | <LL            | <LL                  | <LL            | <LL                  | <LL              | 3 ± 2                |
| IL-8   | 602 ± 2 | 6332 ±<br>1204**   | 812 ±<br>61**        | 918 ±<br>27*** | 1182 ±<br>11***      | 979 ±<br>165*  | 1473 ±<br>60***      | 1514 ±<br>161*** | 1655 ±<br>255**      |
| IL-12  | <LL     | 17 ± 3             | <LL                  | <LL            | <LL                  | <LL            | <LL                  | <LL              | <LL                  |
| TNF-α  | 7 ± 0   | 2523 ±<br>35***    | 9 ± 0***             | 10 ±<br>0***   | 11 ± 1**             | 11 ± 1**       | 12 ±<br>0***         | 16 ±<br>1***     | 16 ±<br>0***         |
| MCP1   | >UL     | >UL                | >UL                  | >UL            | >UL                  | >UL            | >UL                  | >UL              | >UL                  |
| MIP-1α | 39 ± 2  | 2359 ±<br>352***   | 49 ± 3**             | 48 ±<br>3*     | 66 ±<br>3***         | 53 ±<br>2***   | 73 ±<br>5***         | 62 ±<br>2***     | 87 ±<br>2***         |
| MIP-1β | 86 ± 1  | >UL                | 171 ±<br>5***        | 120 ±<br>5***  | 244 ±<br>7***        | 176 ±<br>6***  | 360 ±<br>13***       | 396 ±<br>20***   | 595 ±<br>12***       |
| IP10   | 142 ± 1 | 669 ±<br>16***     | 342 ±<br>14***       | 99 ±<br>5***   | 459 ±<br>30***       | 236 ±<br>20*** | 775 ±<br>55***       | 414 ±<br>38***   | 1232 ±<br>84***      |
| RANTES | 31 ± 1  | 10487 ±<br>1570*** | 37 ± 2**             | 35 ±<br>2*     | 47 ±<br>0***         | 40 ± 2**       | 63 ±<br>4***         | 67 ±<br>6***     | 90 ±<br>3***         |

**Supplemental Table I. Differential secretion of Th1-associated cytokines by LC exposed to increasing concentrations of A2t inhibitors (A2ti) in the presence or absence of HPV16.** LC exposed to A2ti and HPV16 showed increased secretion of Th1-associated chemokines compared to controls. LC were left untreated or incubated with LPS or increasing concentrations of A2ti with and without HPV16. Supernatants were collected at 48 hours and analyzed in triplicate for the presence of cytokines and chemokines. These data are a representative example of an experiment performed three times expressed as the mean concentration ± SD (\*P<0.05, \*\*P<0.01, \*\*\*P < 0.001 as determined by a two-tailed, unpaired t-test, as compared to untreated LC).

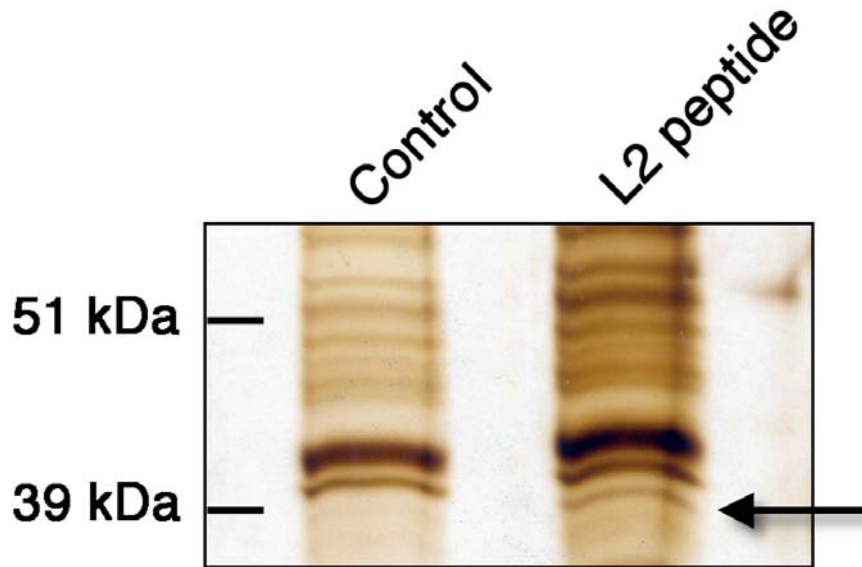

**Supplemental Figure 1. Annexin A2 is visualized as a unique band in L2<sub>108-126</sub> pulldown eluates.** LC were incubated with either no peptide or 50 ug/mL of (6x)His-L2<sub>108-126</sub> peptide and subsequently cross-linked with DTSSP. Cells were lysed and mixed with a Ni-NTA agarose slurry and eluted. Reduced eluates were electrophoresed and silver stained. The unique band right above ~39 kDa was isolated and analyzed by mass spectrometry and found to be annexin A2.
